# Supplementary material
Source: MDPI journal article supplement (https://www.mdpi.com/2227-9717/9/1/168)
Supplement: s1 [file s1]

## Supplementary Materials

# Optimal Design of a Hydrolysis Sugar Membrane Purification System Using a Superstructure-based Approach

Chien-Yuan Su <sup>1</sup>, Bo-Yan Ji <sup>2</sup>, Pei-Jung Yu <sup>1</sup>, Ming-Hua Wang <sup>1</sup>, Wei-Chun Hung <sup>1</sup>, Ying-Hsi Chang <sup>1</sup> and Jui-Yuan Lee <sup>2,3,\*</sup>

<sup>1</sup> Green Energy & Environment Research Laboratories, Industrial Technology Research Institute, Hsinchu 310, Taiwan, R.O.C.; [sucy@itri.org.tw](mailto:sucy@itri.org.tw) (C.-Y.S.), [winnieyu@itri.org.tw](mailto:winnieyu@itri.org.tw) (P.-J.Y.), [cellowang@itri.org.tw](mailto:cellowang@itri.org.tw) (M.-H.W.), [wchung@itri.org.tw](mailto:wchung@itri.org.tw) (W.-C.H.), [YH\\_Chang@itri.org.tw](mailto:YH_Chang@itri.org.tw) (Y.-H.C.)

<sup>2</sup> Department of Chemical Engineering and Biotechnology, National Taipei University of Technology, 1, Sec. 3, Zhongxiao E. Road, Taipei 10608, Taiwan, R.O.C.; [bobo85712@gmail.com](mailto:bobo85712@gmail.com)

<sup>3</sup> Research Center of Energy Conservation for New Generation of Residential, Commercial, and Industrial Sectors, National Taipei University of Technology, 1, Sec. 3, Zhongxiao E. Rd., Taipei 10608, Taiwan, R.O.C.

\* Correspondence: [juiyuan@ntut.edu.tw](mailto:juiyuan@ntut.edu.tw); Tel.: +886-2-2771-2171 (ext. 2524)

Number of pages: 4

Number of tables: 3

**Table S1.** Flowrates in the NF membrane network for scenario 1 (t/h).

| Unit | Inlet stream                          | Outlet stream                                                                       |
|------|---------------------------------------|-------------------------------------------------------------------------------------|
| MF   | Feed mixture = 3                      | To MR1 = 1; permeate product = 2                                                    |
| MR1  | From MF = 1; freshwater = 2           | To MR2 = 1; to MP1 = 2                                                              |
| MR2  | From MR1 = 1; from MP1 = 2            | To MR3 = 1; permeate product = 0.03; waste = 1.97                                   |
| MR3  | From MR2 = 1; from MP1 = 2            | To MR4 = 1; to MP1 = 1.927; permeate product = 0.052; waste = 0.021                 |
| MR4  | From MR3 = 1; freshwater = 2          | To MR5 = 1; MP1 = 2                                                                 |
| MR5  | From MR4 = 1; freshwater = 2          | To MR6 = 1; MP1 = 2                                                                 |
| MR6  | From MR5 = 1; freshwater = 2          | To MR7 = 1; MP1 = 2                                                                 |
| MR7  | From MR6 = 1; freshwater = 2          | To MR8 = 1; MP1 = 2                                                                 |
| MR8  | From MR7 = 1; freshwater = 2          | To MR9 = 1; MP1 = 0.073; permeate product = 1.927                                   |
| MR9  | From MR8 = 1; freshwater = 2          | To MR10 = 1; permeate product = 0.142; waste = 1.858                                |
| MR10 | From MR9 = 1; freshwater = 2          | To MR11 = 1; permeate product = 0.14; waste = 1.86                                  |
| MR11 | From MR10 = 1; freshwater = 2         | To MR12 = 1; permeate product = 0.019; waste = 1.981                                |
| MR12 | From MR11 = 1; freshwater = 2         | To MR13 = 1; permeate product = 0.139; waste = 1.861                                |
| MR13 | From MR12 = 1; freshwater = 2         | To MR14 = 1; permeate product = 2                                                   |
| MR14 | From MR13 = 1; freshwater = 2         | To MR15 = 1; permeate product = 2                                                   |
| MR15 | From MR14 = 1; freshwater = 2         | To MR16 = 1; permeate product = 0.029; waste = 1.971                                |
| MR16 | From MR15 = 1; freshwater = 2         | To MR17 = 1; permeate product = 0.014; waste = 1.986                                |
| MR17 | From MR16 = 1; freshwater = 2         | To MR18 = 1; permeate product = 0.014; waste = 1.986                                |
| MR18 | From MR17 = 1; freshwater = 2         | To MR19 = 0.763; retentate product = 0.237; permeate product = 0.014; waste = 1.986 |
| MR19 | From MR18 = 0.763; freshwater = 2.237 | Retentate product = 1; permeate product = 0.014; waste = 1.986                      |
| MP1  | From MR units = 12                    | To MR units = 4; permeate product = 8                                               |

**Table S2.** Flowrates in the NF membrane network for scenario 2 (t/h).

| Unit | Inlet stream                                        | Outlet stream                                                       |
|------|-----------------------------------------------------|---------------------------------------------------------------------|
| MF   | Feed mixture = 3                                    | To MR1 = 1; permeate product = 2                                    |
| MR1  | From MF = 1; from MP1 = 0.191; freshwater = 1.809   | To MR2 = 1; waste = 2                                               |
| MR2  | From MR1 = 1; from MP1 = 0.027; freshwater = 1.973; | To MR3 = 1; waste = 2                                               |
| MR3  | From MR2 = 1; from MP1 = 0.459; freshwater = 1.541; | To MR4 = 1; to MP1 = 0.869; permeate product = 0.566; waste = 0.566 |
| MR4  | From MR3 = 1; from MP1 = 2                          | To MR5 = 1; to MP1 = 1.334; waste = 0.666                           |
| MR5  | From MR4 = 1; from MP1 = 1.634; freshwater = 0.366; | To MR6 = 1; to MP1 = 2                                              |
| MR6  | From MR5 = 1; from MP1 = 1.089; freshwater = 0.911; | To MR7 = 1; to MP1 = 2                                              |
| MR7  | From MR6 = 1; freshwater = 2;                       | To MR8 = 1; to MP1 = 2                                              |
| MR8  | From MR7 = 1; freshwater = 2;                       | To MR9 = 1; to MP1 = 2                                              |
| MR9  | From MR8 = 1; freshwater = 2;                       | To MR10 = 1; to MP1 = 2                                             |
| MR10 | From MR9 = 1; freshwater = 2;                       | To MR11 = 1; to MP1 = 2                                             |
| MR11 | From MR10 = 1; freshwater = 2;                      | To MR12 = 1; to MP1 = 2                                             |
| MR12 | From MR11 = 1; freshwater = 2;                      | To MR13 = 1; permeate product = 2                                   |
| MR13 | From MR12 = 1; freshwater = 2;                      | To MR14 = 0.913; retentate product = 0.087; permeate product = 2    |
| MR14 | From MR13 = 0.913 freshwater = 2.087;               | Retentate product = 1; permeate product = 2                         |
| MP1  | From MR units = 16.203                              | To MR units = 5.401; permeate product = 10.802                      |

**Table S3.** Flowrates in the NF membrane network for scenario 3 (t/h).

| Unit | Inlet stream                                       | Outlet stream                                        |
|------|----------------------------------------------------|------------------------------------------------------|
| MF   | Feed mixture = 3                                   | To MR1 = 1; permeate product = 2                     |
| MR1  | From MF = 1; from MP1 = 2                          | To MR2 = 1; to MP1 = 0.273; waste = 1.727            |
| MR2  | From MR1 = 1; from MP1 = 0.478; freshwater = 1.522 | To MR3 = 1; to MP1 = 2                               |
| MR3  | From MR2 = 1; freshwater = 2                       | To MR4 = 1; to MP1 = 2                               |
| MR4  | From MR3 = 1; freshwater = 2                       | To MR5 = 1; to MP1 = 2                               |
| MR5  | From MR4 = 1; freshwater = 2                       | To MR6 = 1; to MP1 = 1.16; waste = 0.84              |
| MR6  | From MR5 = 1; freshwater = 2                       | To MR7 = 1; permeate product = 1.84; waste = 0.16    |
| MR7  | From MR6 = 1; freshwater = 2                       | To MR8 = 1; waste = 2                                |
| MR8  | From MR7 = 1; freshwater = 2                       | To MR9 = 0.599; retentate product = 0.401; waste = 2 |
| MR9  | From MR8 = 0.599; freshwater = 2.401               | To MR10 = 1; waste = 2                               |
| MR10 | From MR9 = 1; freshwater = 2                       | Retentate product = 1; waste = 2                     |
| MP1  | From MR units = 7.433                              | To MR units = 2.478; permeate product = 4.955        |
